# Supplementary material
Source: publisher figshare collection journal article supplement (https://acs.figshare.com/ndownloader/files/21768051)
Supplement: Supplementary file 1 [file 21768051]

**Coming to order: Adsorption and structure of nonionic polymer at the oil/water interface as influenced by cationic and anionic surfactants**

***Supporting Information***

Rebecca M. Altman, Geraldine L. Richmond\*

Department of Chemistry and Biochemistry, University of Oregon, Eugene, Oregon, 97403  
United States

Table of Contents:

Figure 3 spectral fit parameters: pgs. 2-3  
Figure 5 spectral fit parameters: pg. 4  
Figure 6 spectral fit parameters: pg. 4  
Figure 7 spectral inset fit parameters: pg. 5  
Figure 8 spectral fit parameters: pgs. 6-8  
Supplementary VSF spectra: pg. 9

\*Corresponding author, email: richmond@uoregon.edu, phone: (541) 346-4635

### SUPPLEMENTAL INFORMATION:

Variables in the following tables correspond to the VSF fit equation given in Equation 3.

#### **FIGURE 3 Spectral fits:**

| PAM + 0.015 mM d-DTAB<br>(SSP)                |               | 0.015 mM PAM      | 4.2 mM PAM        | 21 mM PAM         |
|-----------------------------------------------|---------------|-------------------|-------------------|-------------------|
| Peak 1<br>(C-H stretch)                       | Amplitude     | $0.06 \pm 0.01$   | $0.096 \pm 0.009$ | $0.11 \pm 0.01$   |
|                                               | Phase         | 0                 | 0                 | 0                 |
|                                               | Lorentzian    | 2                 | 2                 | 2                 |
|                                               | Peak Position | $2875 \pm 3$      | $2872 \pm 2$      | $2871 \pm 2$      |
|                                               | Gaussian      | $15 \pm 4$        | $15 \pm 2$        | $15 \pm 3$        |
| Peak 2<br>(CH <sub>2</sub> symmetric stretch) | Amplitude     | $0.319 \pm 0.003$ | $0.450 \pm 0.003$ | $0.458 \pm 0.004$ |
|                                               | Phase         | 0                 | 0                 | 0                 |
|                                               | Lorentzian    | 2                 | 2                 | 2                 |
|                                               | Peak Position | $2935.5 \pm 0.3$  | $2935.7 \pm 0.2$  | $2935.2 \pm 0.2$  |
|                                               | Gaussian      | $14.4 \pm 0.3$    | $14.1 \pm 0.2$    | $14.0 \pm 0.3$    |

**Table S1:** Fit parameters for mixed system traces in Figure 3a. All solutions consisted of PAM (0.015, 4.2, and 21 mM) with 0.015 mM d-DTAB in D<sub>2</sub>O. Peaks 1 and 2 correspond to the alpha carbon CH stretch and the CH<sub>2</sub> symmetric stretch (d+) from the PAM backbone, respectively.

| 0.015 mM d-DTAB (SSP)                              |               |                 |
|----------------------------------------------------|---------------|-----------------|
| Peak 1<br>(Coordinated<br>D <sub>2</sub> O peak 1) | Amplitude     | $0.92 \pm 0.02$ |
|                                                    | Phase         | 3.14            |
|                                                    | Lorentzian    | 2               |
|                                                    | Peak Position | $2576 \pm 4$    |
|                                                    | Gaussian      | $47 \pm 3$      |
| Peak 2<br>(Coordinated<br>D <sub>2</sub> O peak 2) | Amplitude     | $0.42 \pm 0.02$ |
|                                                    | Phase         | 0               |
|                                                    | Lorentzian    | 2               |
|                                                    | Peak Position | $2719 \pm 1$    |
|                                                    | Gaussian      | $18 \pm 1$      |
| Peak 3<br>(Free OD)                                | Amplitude     | $0.11 \pm 0.02$ |
|                                                    | Phase         | 0               |
|                                                    | Lorentzian    | 2               |
|                                                    | Peak Position | $2682 \pm 1$    |
|                                                    | Gaussian      | $15 \pm 3$      |

**Table S2:** Fit parameters for the d-DTAB in D<sub>2</sub>O (grey) trace in Figure 3a. Peaks 1 and 2 correspond to coordinated water modes and Peak 3 corresponds to the free OD mode.

| PAM + 0.015 mM d-DTAB<br>(SPS)                   |               | 0.015 mM PAM    | 4.2 mM PAM      | 21 mM PAM       |
|--------------------------------------------------|---------------|-----------------|-----------------|-----------------|
| Peak 1<br>(C-H stretch)                          | Amplitude     | $1.71 \pm 0.09$ | $1.60 \pm 0.09$ | $1.47 \pm 0.08$ |
|                                                  | Phase         | 0               | 0               | 0               |
|                                                  | Lorentzian    | 2               | 2               | 2               |
|                                                  | Peak Position | $2875 \pm 3$    | $2873 \pm 3$    | $2870 \pm 3$    |
|                                                  | Gaussian      | $63 \pm 14$     | $63 \pm 13$     | $52 \pm 7$      |
| Peak 2<br>(CH <sub>2</sub> symmetric<br>stretch) | Amplitude     | $0.12 \pm 0.2$  | $1.2 \pm 0.2$   | $1.07 \pm 0.07$ |
|                                                  | Phase         | 0               | 0               | 0               |
|                                                  | Lorentzian    | 2               | 2               | 2               |
|                                                  | Peak Position | $2959 \pm 2$    | $2957 \pm 2$    | $2957 \pm 1$    |
|                                                  | Gaussian      | $32 \pm 3$      | $30 \pm 3$      | $28 \pm 2$      |
| Nonresonant                                      | Amplitude     | $1.09 \pm 0.05$ | $1.07 \pm 0.05$ | $1.08 \pm 0.04$ |
|                                                  | Phase         | 3.14            | 3.14            | 3.14            |

**Table S3:** Fit parameters for mixed system traces in Figure 3b. All solutions consisted of PAM (0.015, 4.2, and 21 mM) with 0.015 mM d-DTAB in D<sub>2</sub>O. Peaks 1 and 2 correspond to the alpha carbon CH stretch and the CH<sub>2</sub> asymmetric stretch (d-) from the PAM backbone, respectively. The elevated background in the spectra is fit to a nonresonant signal.

**FIGURE 5 Spectral fits:**

| PAM + 0.015 mM d-DTAB (SSP) |               | 0.015 mM PAM     | 4.2 mM PAM       | 21 mM PAM        |
|-----------------------------|---------------|------------------|------------------|------------------|
| C=O peak                    | Amplitude     | $1.51 \pm 0.09$  | $2.2 \pm 0.1$    | $1.85 \pm 0.08$  |
|                             | Phase         | 0                | 0                | 0                |
|                             | Lorentzian    | 5                | 5                | 5                |
|                             | Peak Position | $1650.4 \pm 0.8$ | $1651.1 \pm 0.6$ | $1649.6 \pm 0.5$ |
|                             | Gaussian      | $12 \pm 1$       | $10.3 \pm 0.8$   | $10.0 \pm 0.7$   |

**Table S4:** Fit parameters for mixed system traces of the carbonyl region in Figure 5. All solutions consisted of PAM (0.015mM, 4.2, and 21 mM) with 0.015 mM d-DTAB in D<sub>2</sub>O.**FIGURE 6 Spectral fits:**

| PAM + 0.001 mM d-CTAB (SSP)                   |               | 0.015 mM PAM      | 4.2 mM PAM        | 21 mM PAM         |
|-----------------------------------------------|---------------|-------------------|-------------------|-------------------|
| Peak 1<br>(C-H stretch)                       | Amplitude     | $0.051 \pm 0.007$ | $0.07 \pm 0.008$  | $0.12 \pm 0.01$   |
|                                               | Phase         | 0                 | 0                 | 0                 |
|                                               | Lorentzian    | 2                 | 2                 | 2                 |
|                                               | Peak Position | $2879 \pm 3$      | $2875 \pm 2$      | $2873 \pm 2$      |
|                                               | Gaussian      | $20 \pm 4$        | $15 \pm 2$        | $12 \pm 2$        |
| Peak 2<br>(CH <sub>2</sub> symmetric stretch) | Amplitude     | $0.266 \pm 0.002$ | $0.413 \pm 0.002$ | $0.396 \pm 0.004$ |
|                                               | Phase         | 0                 | 0                 | 0                 |
|                                               | Lorentzian    | 2                 | 2                 | 2                 |
|                                               | Peak Position | $2937.2 \pm 0.3$  | $2937.1 \pm 0.2$  | $2934.0 \pm 0.3$  |
|                                               | Gaussian      | $15.7 \pm 0.3$    | $15.4 \pm 0.2$    | $15.4 \pm 0.3$    |

**Table S5:** Fit parameters for mixed system traces in Figure 6. All solutions consisted of PAM (0.015, 4.2, and 21 mM) with 0.001 mM d-CTAB in D<sub>2</sub>O. Peaks 1 and 2 correspond to the alpha carbon CH stretch and the CH<sub>2</sub> symmetric stretch (d+) from the PAM backbone, respectively.

**FIGURE 7 Spectral fits:**

| 4.2mM PAM + 0.015 mM d-DTAB (SSP)             |               | @ t = t <sub>o</sub> | @ t > t <sub>eq</sub> |
|-----------------------------------------------|---------------|----------------------|-----------------------|
| Peak 1<br>(C-H stretch)                       | Amplitude     | 0.07 ± 0.008         | 0.07 ± 0.008          |
|                                               | Phase         | 0                    | 0                     |
|                                               | Lorentzian    | 2                    | 2                     |
|                                               | Peak Position | 2875 ± 2             | 2874 ± 2              |
|                                               | Gaussian      | 17 ± 3               | 16 ± 2                |
| Peak 2<br>(CH <sub>2</sub> symmetric stretch) | Amplitude     | 0.357 ± 0.002        | 0.363 ± 0.002         |
|                                               | Phase         | 0                    | 0                     |
|                                               | Lorentzian    | 2                    | 2                     |
|                                               | Peak Position | 2936.4 ± 0.2         | 2936.0 ± 0.2          |
|                                               | Gaussian      | 14.6 ± 0.2           | 14.1 ± 0.2            |

**Table S6:** Fit parameters for the mixed system spectral insets in Figure 7. All solutions consisted of 4.2 mM PAM with 0.015 mM d-DTAB in D<sub>2</sub>O. Peaks 1 and 2 correspond to the alpha carbon CH stretch and the CH<sub>2</sub> symmetric stretch (d+) from the PAM backbone, respectively. Comparison of the VSF peak fit intensities from t<sub>o</sub> to t<sub>eq</sub> show the spectra of polyacrylamide is unchanging over time.

**FIGURE 8 Spectral Fits:**

| PAM + 0.015 mM d-SDS (SSP)                    |               | 0.015 mM PAM  | 4.2 mM PAM  | 21 mM PAM   |
|-----------------------------------------------|---------------|---------------|-------------|-------------|
| Peak 1<br>(Coordinated D <sub>2</sub> O)      | Amplitude     | 0.9 ± 0.1     | 0.7 ± 0.1   | 0.7 ± 0.2   |
|                                               | Phase         | 0             | 0           | 0           |
|                                               | Lorentzian    | 5             | 5           | 5           |
|                                               | Peak Position | 2485 ± 6      | 2484 ± 25   | 2486 ± 48   |
|                                               | Gaussian      | 80 ± 6        | 96 ± 4      | 110 ± 7     |
| Peak 2<br>(Free OD)                           | Amplitude     | 0.5 ± 0.1     | 0.42 ± 0.08 | 0.5 ± 0.2   |
|                                               | Phase         | 0             | 0           | 0           |
|                                               | Lorentzian    | 12            | 12          | 12          |
|                                               | Peak Position | 2716 ± 1      | 2717 ± 2    | 2719 ± 2    |
|                                               | Gaussian      | 8 ± 2         | 10 ± 2      | 8 ± 3       |
| Peak 3<br>(Background peak 1)                 | Amplitude     | 0.09 ± 0.03   | 0.1 ± 0.04  | 0.10 ± 0.04 |
|                                               | Phase         | 0             | 0           | 0           |
|                                               | Lorentzian    | 5             | 5           | 5           |
|                                               | Peak Position | 2789 ± 2      | 2790 ± 3    | 2791 ± 3    |
|                                               | Gaussian      | 40 ± 8        | 43 ± 10     | 44 ± 10     |
| Peak 4<br>(Background peak 2)                 | Amplitude     | 0.067 ± 0.009 | 0.07 ± 0.02 | 0.08 ± 0.03 |
|                                               | Phase         | 0             | 0           | 0           |
|                                               | Lorentzian    | 5             | 5           | 5           |
|                                               | Peak Position | 2871 ± 31     | 2872 ± 47   | 2878 ± 43   |
|                                               | Gaussian      | 111 ± 31      | 112 ± 46    | 115 ± 46    |
| Peak 5<br>(CH <sub>2</sub> symmetric stretch) | Amplitude     | 0.08 ± 0.01   | 0.09 ± 0.01 | 0.07 ± 0.01 |
|                                               | Phase         | 3.14          | 3.14        | 3.14        |
|                                               | Lorentzian    | 2             | 2           | 2           |
|                                               | Peak Position | 2932 ± 2      | 2931 ± 2    | 2928 ± 3    |
|                                               | Gaussian      | 13 ± 3        | 16 ± 3      | 20 ± 5      |

**Table S7:** Fit parameters for mixed system traces in Figure 8a. All solutions consisted of PAM (0.015, 4.2, and 21 mM) with 0.015 mM d-SDS in D<sub>2</sub>O. Peaks 1 and 2 correspond to the coordinated water and free OD modes, respectively. Peaks 3 and 4 fit the broad signal from ~2750-3050 cm<sup>-1</sup>, characterizing the background signal from the sulfate headgroup of d-SDS. Peak 5 is assigned to the d+ stretch from the PAM backbone.

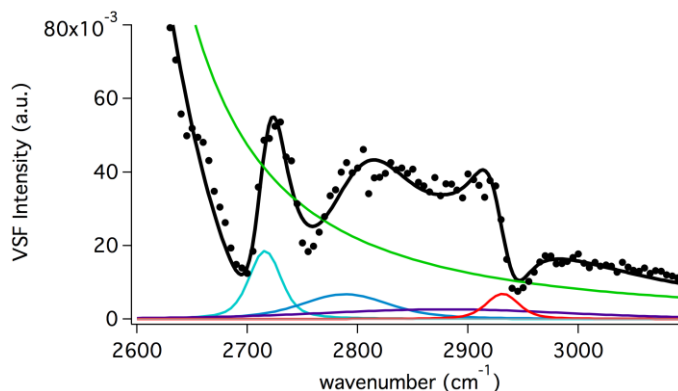

**Figure S1:** The underlying five peaks that contribute the full fit for 4.2 mM PAM with 0.015 mM d-SDS in D<sub>2</sub>O in Figure 8a (black trace shown here). The coordinated D<sub>2</sub>O, Free OD, and two background peaks are displayed as the green, light blue, and dark blue and purple traces, respectively. The red peak is the PAM asymmetric CH<sub>2</sub> stretch (also shown in Figure 8a), which is responsible for the interference feature observed in all the mixed system spectra in Figure 8a.

| 0.015 mM d-SDS (SSP)                     |               |                 |
|------------------------------------------|---------------|-----------------|
| Peak 1<br>(Coordinated D <sub>2</sub> O) | Amplitude     | $0.9 \pm 0.2$   |
|                                          | Phase         | 0               |
|                                          | Lorentzian    | 5               |
|                                          | Peak Position | $2480 \pm 30$   |
|                                          | Gaussian      | $100 \pm 4$     |
| Peak 2<br>(Free OD)                      | Amplitude     | $0.62 \pm 0.06$ |
|                                          | Phase         | 0               |
|                                          | Lorentzian    | 12              |
|                                          | Peak Position | $2719 \pm 2$    |
|                                          | Gaussian      | $11 \pm 1$      |
| Peak 3<br>(Background peak 1)            | Amplitude     | $0.10 \pm 0.01$ |
|                                          | Phase         | 0               |
|                                          | Lorentzian    | 5               |
|                                          | Peak Position | $2781 \pm 3$    |
|                                          | Gaussian      | $40 \pm 8$      |
| Peak 4<br>(Background peak 2)            | Amplitude     | $0.14 \pm 0.02$ |
|                                          | Phase         | 0               |
|                                          | Lorentzian    | 5               |
|                                          | Peak Position | $2880 \pm 9$    |
|                                          | Gaussian      | $112 \pm 14$    |

**Table S8:** Fit parameters for the d-SDS in D<sub>2</sub>O (grey) trace in Figure 8a. Peaks 1 and 2 correspond to the coordinated water and free OD modes, respectively. Peaks 3 and 4 fit the broad signal from ~2750-3050 cm<sup>-1</sup>, characterizing the background signal from the sulfate headgroup of SDS.

| 0.015 mM d-SDS + 1 M NaCl<br>(SSP)                 |               | 0 mM PAM          | 4.2 mM PAM        |
|----------------------------------------------------|---------------|-------------------|-------------------|
| Peak 1<br>(Coordinated<br>D <sub>2</sub> O peak 1) | Amplitude     | $0.07 \pm 0.01$   | $0.080 \pm 0.007$ |
|                                                    | Phase         | 0                 | 0                 |
|                                                    | Lorentzian    | 5                 | 5                 |
|                                                    | Peak Position | $2646 \pm 4$      | $2640 \pm 8$      |
|                                                    | Gaussian      | $60 \pm 10$       | $75 \pm 22$       |
| Peak 2<br>(Coordinated<br>D <sub>2</sub> O peak 2) | Amplitude     | $0.27 \pm 0.01$   | $0.38 \pm 0.01$   |
|                                                    | Phase         | 0                 | 0                 |
|                                                    | Lorentzian    | 5                 | 5                 |
|                                                    | Peak Position | $2488 \pm 12$     | $2490 \pm 8$      |
|                                                    | Gaussian      | $88 \pm 11$       | $66 \pm 8$        |
| Peak 3<br>(Free OD)                                | Amplitude     | $0.11 \pm 0.03$   | $0.1 \pm 0.1$     |
|                                                    | Phase         | 0                 | 0                 |
|                                                    | Lorentzian    | 12                | 12                |
|                                                    | Peak Position | $2720 \pm 2$      | $2719 \pm 4$      |
|                                                    | Gaussian      | $11 \pm 5$        | $8 \pm 11$        |
| Peak 4<br>(Background<br>peak 1)                   | Amplitude     | $0.03 \pm 0.01$   | $0.04 \pm 0.02$   |
|                                                    | Phase         | 0                 | 0                 |
|                                                    | Lorentzian    | 5                 | 5                 |
|                                                    | Peak Position | $2785 \pm 8$      | $2790 \pm 9$      |
|                                                    | Gaussian      | $53 \pm 18$       | $43 \pm 19$       |
| Peak 5<br>(Background<br>peak 2)                   | Amplitude     | $0.067 \pm 0.004$ | $0.056 \pm 0.004$ |
|                                                    | Phase         | 0                 | 0                 |
|                                                    | Lorentzian    | 5                 | 5                 |
|                                                    | Peak Position | $2906 \pm 18$     | $2909 \pm 21$     |
|                                                    | Gaussian      | $174 \pm 35$      | $123 \pm 37$      |

**Table S9:** Fit parameters for mixed system traces in Figure 8b. All solutions contain 0.015 mM d-SDS and 1 M NaCl in D<sub>2</sub>O, with either 0mM or 4.2 mM PAM. Peaks 1 and 2 correspond to the two coordinated water modes, and Peak 3 corresponds to the Free OD mode. Peaks 4 and 5 are two background peaks, fitting the broad signal from  $\sim 2750$ - $3050$  cm<sup>-1</sup> to characterize the background signal from the sulfate headgroup of d-SDS.



**SUPPLEMENTARY VSF SPECTRA:**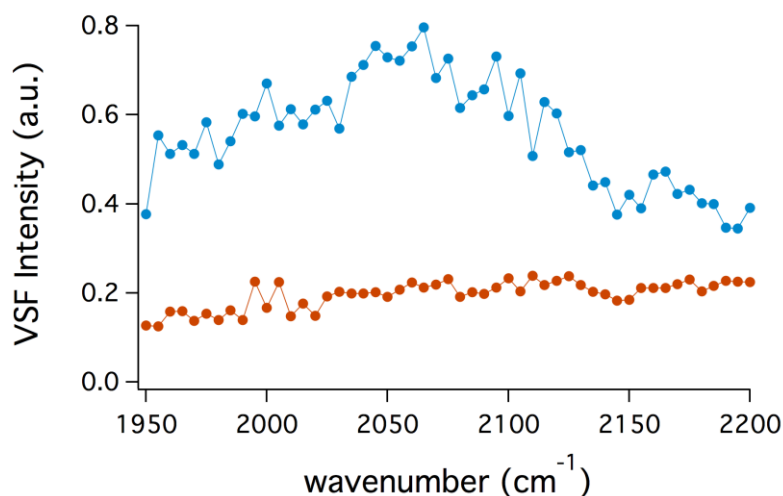

**Figure S2:** Spectra in SSP polarization combination of 0.015 mM d-DTAB in solvents H<sub>2</sub>O (orange trace) and D<sub>2</sub>O (blue trace). Lines are guides to the eye. No C-D peaks from d-DTAB are observed around 2100 cm<sup>-1</sup> in either spectra. At this concentration of surfactant, the C-D modes of the d-DTAB are hidden under the VSF signal from coordinated water molecules, which is induced by the surfactant's interfacial charge. Because D<sub>2</sub>O modes are redshifted to lower wavenumbers from the H<sub>2</sub>O modes, the surfactant solution containing D<sub>2</sub>O as the solvent (blue trace) has a higher VSF intensity. In either solvent, C-D modes of surfactant are not observed.
